# Supplementary material
Source: PubMed Central journal article supplement (PMC5930367)
Supplement: AEM.00043-18_zam010188520s1.pdf [file AEM.00043-18_zam010188520s1.pdf]

**Fig. S1 The motif analysis of the coding region of NR.**

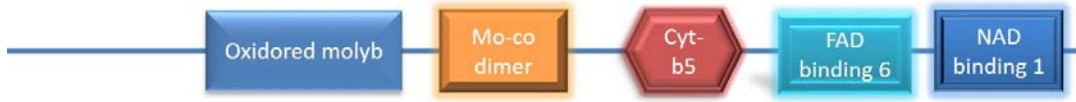

**Fig. S2 The expression of the *NR* gene in randomly selected NR-silenced transformants.**

The wild-type and NR-silenced strains were cultured on PDA plates for 5 days and then exposed to 42°C for 20 min. The expression levels of the *NR* genes were measured immediately after HS. The values are the means  $\pm$  SD of three independent experiments. Asterisks indicate significant differences compared to untreated strains (Student's t-test: \*\*P < 0.01).

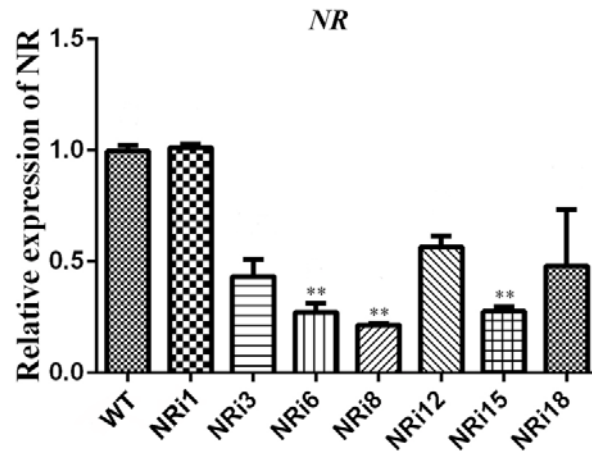

**Fig. S3 The expression of the *CaM* gene in randomly selected CaM-silenced transformants.**

The wild-type and CaM-silenced strains were cultured on PDA plates for 5 days and then exposed to 42°C for 20 min. The expression levels of the *CaM* genes were measured immediately after HS. The values are the means  $\pm$  SD of three independent experiments. Asterisks indicate significant differences compared to the untreated strains (Student's t-test: \*\*P < 0.01).

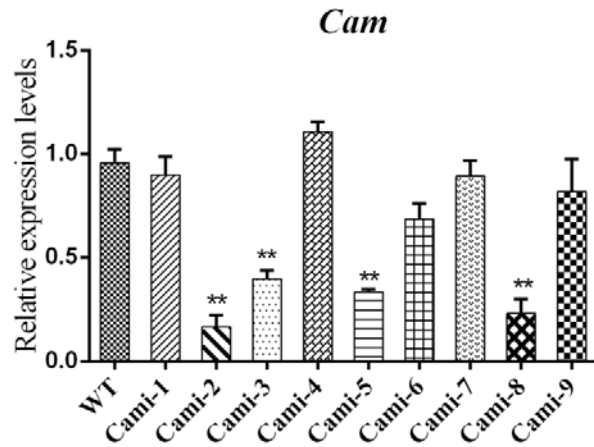

**Table S1 Oligonucleotide primers used**

| Primer  | Sequence (5' to 3')            | Description                       |
|---------|--------------------------------|-----------------------------------|
| NRi-F   | ATCGGGATCCATGATCACCCCTACCAAATT | Amplify the ORF of <i>NR</i>      |
| NRi-R   | ATCGTCTAGACTAGAAGATGAATAGGTCGT |                                   |
| NRRT-F  | TCCGCAACCACGGGAATGTC           | Detects the <i>NR</i> expression  |
| NRRT-R  | CGGTTTCCGTCGCAGCCTAA           |                                   |
| CaMi-F  | ATCGGGTACCGGCGTTCTCCCTGTTTCGA  | Amplify the ORF of <i>CaM</i>     |
| CaMi-R  | ATCGACTAGTCTCGCCGAGGTTGGTCAT   |                                   |
| CaMRT-F | CCCCGAGTTCCTGACGATG            | Detects the <i>CaM</i> expression |
| CaMRT-R | AGCTTCTCGCCGAGGTTGG            |                                   |

**Table S2 The interplays between NO and Ca<sup>2+</sup> during different abiotic stresses.**

| Materials                | Abiotic stress                         | The relationship between NO and Ca <sup>2+</sup> | related phenotype                   | Reference        |
|--------------------------|----------------------------------------|--------------------------------------------------|-------------------------------------|------------------|
| Animal cells             | Without stress                         | NO to impact the release of Ca <sup>2+</sup>     | physiological processes             | (1, 2)           |
| Animal cells             | Without stress                         | Promoting effects on each other                  | cell homeostasis                    | (3)              |
| <i>Arabidopsis</i>       | A high extracellular calcium treatment | Promoting effects on each other                  | Stomatal closure                    | (4)              |
| <i>Ulva compressa</i>    | Copper stress                          | Promoting effects on each other                  | Antioxidant protein gene expression | (5)              |
| Animal cells             | Without stress                         | Promoting effects on each other                  | muscular dystrophy                  | (6)              |
| <i>Ganoderma lucidum</i> | Heat stress                            | Promoting effects on each other                  | Ganoderic acid biosynthesis         | In present study |

## References

1. Stamler JS, Lamas S, Fang FC. 2001. Nitrosylation. the prototypic redox-based signaling mechanism. *Cell* 106:675-683.
2. Takata T, Kimura J, Tsuchiya Y, Naito Y, Watanabe Y. 2011. Calcium/calmodulin-dependent protein kinases as potential targets of nitric oxide. *Nitric Oxide* 25:145-152.
3. Clementi E, Meldolesi J. 1997. The cross-talk between nitric oxide and  $Ca^{2+}$ : a story with a complex past and a promising future. *Trends Pharmacol Sci* 18:266-269.
4. Wang WH, Yi XQ, Han AD, Liu TW, Chen J, Wu FH, Dong XJ, He JX, Pei ZM, Zheng HL. 2012. Calcium-sensing receptor regulates stomatal closure through hydrogen peroxide and nitric oxide in response to extracellular calcium in *Arabidopsis*. *J Exp Bot* 63:177-190.
5. Gonzalez A, Cabrera Mde L, Henriquez MJ, Contreras RA, Morales B, Moenne A. 2012. Cross talk among calcium, hydrogen peroxide, and nitric oxide and activation of gene expression involving calmodulins and calcium-dependent protein kinases in *Ulva compressa* exposed to copper excess. *Plant Physiol* 158:1451-1462.
6. Tidball JG, Wehling-Henricks M. 2014. Nitric oxide synthase deficiency and the pathophysiology of muscular dystrophy. *J Physiol* 592:4627-4638.
